# Supplementary material for: Design of carboxylated single-walled carbon nanotubes as highly efficient inhibitors against Aβ40 fibrillation based on the HyBER mechanism
Source: Royal Society of Chemistry journal article supplement (doi:10.1039/d1tb00920f), 2021-01-01

1 **Design of Carboxylated Single-Walled Carbon Nanotube as High-**  
2 **Efficient Inhibitor against A $\beta$ 40 Fibrillation based on HyBER**  
3 **Mechanism**

4

5 **Wenping Zhao<sup>1#</sup>, Luying Jiang<sup>1#</sup>, Wenjuan Wang<sup>1</sup>, Jingcheng Sang<sup>1</sup>,**

6 **Quancheng Sun<sup>1</sup>, Qinchen Dong<sup>1</sup>, Li Li<sup>2\*</sup>, Fuping Lu<sup>1\*</sup>, Fufeng Liu<sup>1\*</sup>**

7

8 <sup>1</sup>Key Laboratory of Industrial Fermentation Microbiology of Ministry of Education;  
9 Tianjin Key Laboratory of Industrial Microbiology; College of Biotechnology, Tianjin  
10 University of Science & Technology, Tianjin 300457, P. R. China;

11 <sup>2</sup> College of Marine and Environmental Sciences, Tianjin University of Science and  
12 Technology, Tianjin 300457, P. R. China.

13

14 **Corresponding Authors**

15 \*F.F. Liu, E-mail: fufengliu@tust.edu.cn;

16 \*L. Li, E-mail: lili\_2016@tust.edu.cn;

17 \*F.P. Lu, E-mail: fplu@tust.edu.cn

18

19 <sup>#</sup>These authors contributed equally to this work.

20

## 21 **Inductively coupled plasma-mass spectrometry (ICP-MS) analysis**

22 SWCNT-COOH with 4% carboxyl group ratio were mixed with metal ion solution at  
23 1:1 with the final concentration of 200 ppm. Then the mixture was cultured in shaker at 37  
24 °C for 1 h. The unchelated metal ions were removed by 8, 000 ×g centrifugation for 10 min  
25 and repeated three times. The final precipitate was nitrified and the chelating capacity of  
26 WWCNT-COOH were analyzed using a Thermo Fisher ICP-MS. The sample gas rate was  
27 0.75 mL min<sup>-1</sup>, and the additional gas rate was optimized for each run of analyses during  
28 tuning of the instrument (usually 0.12–0.14 mL min<sup>-1</sup>). Sample was pumped into the  
29 instrument at a rate of 120 μL min<sup>-1</sup>. Medium-resolution mode was used for <sup>56</sup>Fe, <sup>64</sup>Cu,  
30 and <sup>65</sup>Zn. Standard curve is the determination of different concentration gradient of the  
31 curve of the single ion solution. R<sup>2</sup> is greater than 99.999%. An E-HNO<sub>3</sub> acid blank and  
32 nitric acid standard were run after each sample on the ICP-MS as a quality control check  
33 of the data and to monitor the blanks associated with the ICP-MS over the course of the  
34 run.

35

36 **Table S1.** Chelating capacity of SWCNT-COOH with 4% carboxyl group

37 ratio for  $Zn^{2+}$ ,  $Cu^{2+}$  and  $Fe^{3+}$ .

| Metal ions | Chelating capacity (mg/g) |
|------------|---------------------------|
| $Zn^{2+}$  | 257.26                    |
| $Cu^{2+}$  | 27.75                     |
| $Fe^{3+}$  | 100.74                    |

38

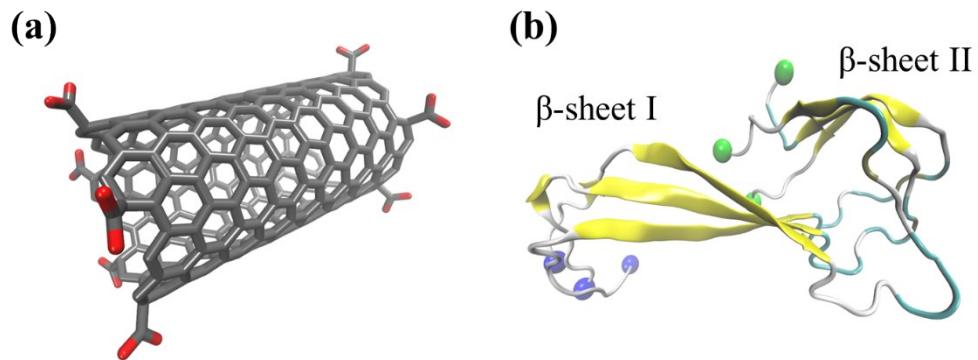

39

40 **Fig.S1.** Three-dimensional structure of SWCNT-COOH (a). The carboxyl modification  
41 rate of the single-walled carbon nanotubes in this experiment was  $\sim 3.57\%$ ; The initial  
42 conformation of A $\beta$ 40 trimer (b), the conformation of amyloid protein is represented by  
43 the NewCartoon, and the blue and green sphere represent the N-terminal and C-terminal  
44 A $\beta$ 40 trimer, and the yellow area represents the amyloid  $\beta$ -sheet structure.

45

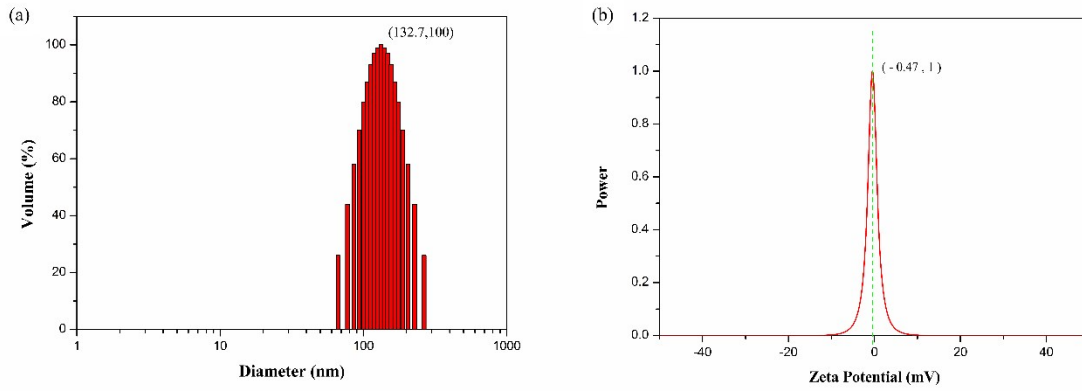

46 **Fig. S2** Particle sizes (a) and Zeta potentials (b) of SWCNT-COOH with 4%  
47 carboxyl group ratio at 25 °C.  
48

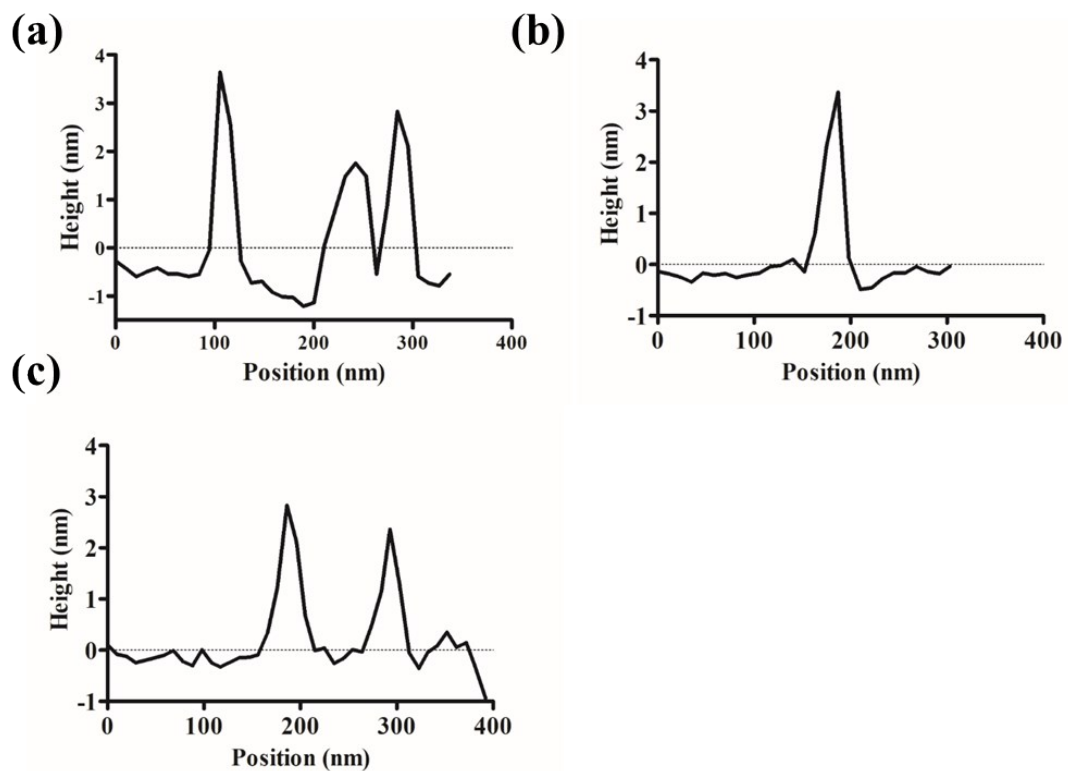

49

50 **Fig.S3.** The corresponding height of the cross-sectional contours of the obtained A $\beta$ 40

51 species in Fig. 2a, 2b and 2c labeled by the black bars are shown in (a), (b) and (c),

52 respectively.

53

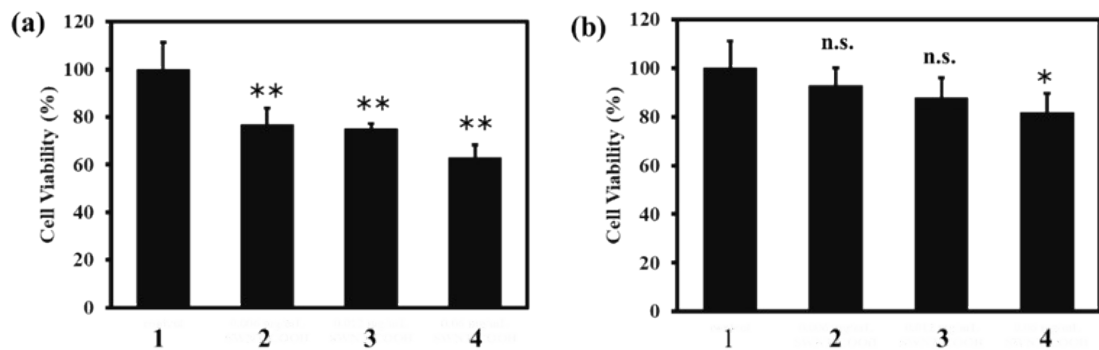

54

55 **Fig. S4.** The effect of SWCNT-COOH with (a) 2% and (b) 4% carboxyl groups on the  
 56 cytotoxicity of PC12 cells. 1, 2, 3 and 4 represent the negative control (only PBS buffer,  
 57 0.0006 mg/mL SWCNT-COOH, 0.0012 mg/ml SWCNT-COOH, 0.006 mg/mL SWCNT-  
 58 COOH), respectively. The viability of cells treated with PBS buffer alone (negative  
 59 control) was set as 100%. All values represent means  $\pm$  s.d. (n=5). n.s. not significant; \*P  
 60 < 0.05; \*\*P < 0.01 compared to the control group.

61

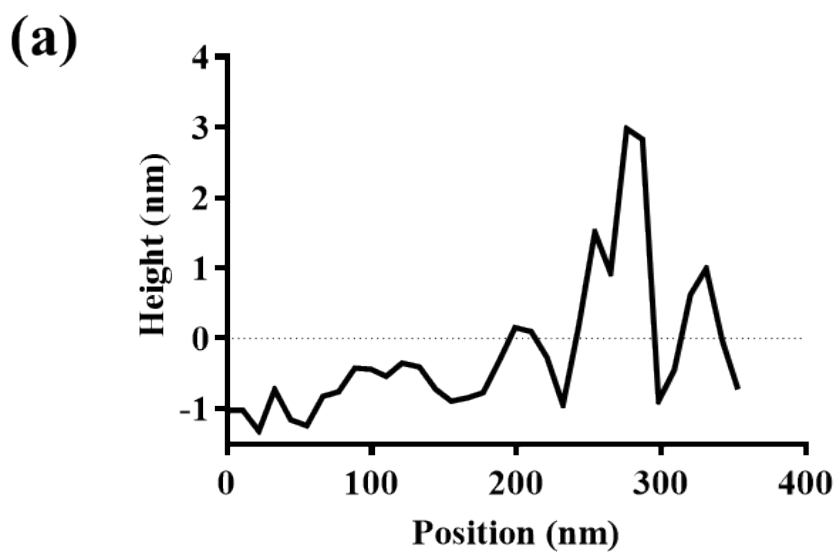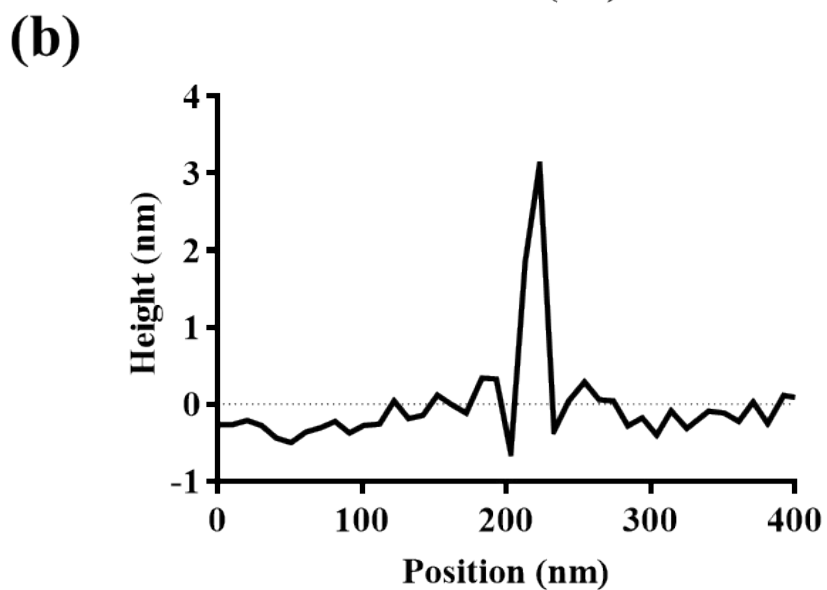

62

63 **Fig.S5.** The corresponding height of the cross-sectional contours of the obtained A $\beta$ 40

64 species in Fig. 4b and 4c labeled by the black bars are shown in (a) and (b), respectively.

65



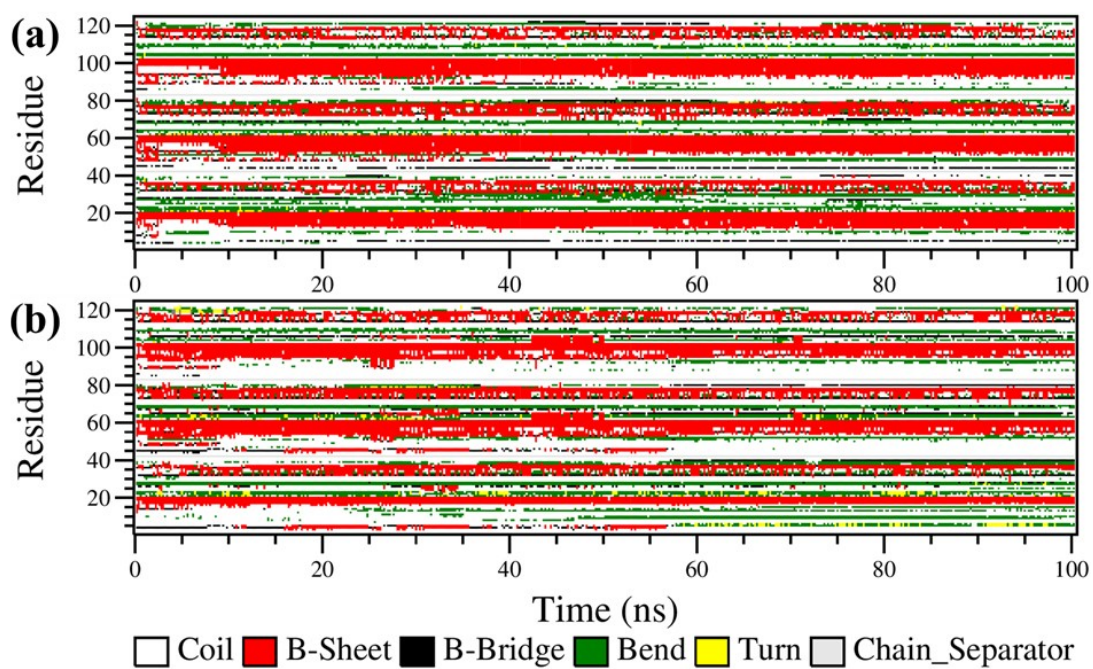

Supplement: d1tb00920f1.pdf [file d1tb00920f1.pdf]
